# Supplementary material for: Effects of biopolyimide molecular design on their silica hybrids thermo-mechanical, optical and electrical properties
Source: Royal Society of Chemistry journal article supplement (doi:10.1039/c8ra01965g), 2018-01-01
Supplement: c8ra01965g1.pdf [file c8ra01965g1.pdf]

*Article for Polymer Chemistry*

## Supporting Information

### Effect of biopolyimide molecular design on their silica hybrids thermo-mechanical, optical and electrical properties

S. Dwivedi,<sup>a</sup> S. Sakamoto,<sup>a</sup> S. Kato,<sup>c</sup> T. Mitsumata<sup>b,c</sup> and T. Kaneko<sup>a,b</sup>

---

<sup>a</sup>*Graduate School of Advanced Science and Technology, Energy and Environment Area, Japan Advanced Institute of Science and Technology, 1-1 Asahidai, Nomi, Ishikawa 923-1292, Japan*

<sup>b</sup>*Japan Science and Technology, ALCA, Tokyo 102-0076, Japan*

<sup>c</sup>*Department of Materials Science & Technology, Faculty of Engineering, Niigata University, Ikarashi, Nishi-ku, Niigata 950-2181 Japan*

† Corresponding Author

Tatsuo Kaneko

Email: kaneko@jaist.ac.jp

Electronic Supplementary Information (ESI) available: [Polyimide Synthesis and Characterization]. See DOI: 10.1039/x0xx00000x

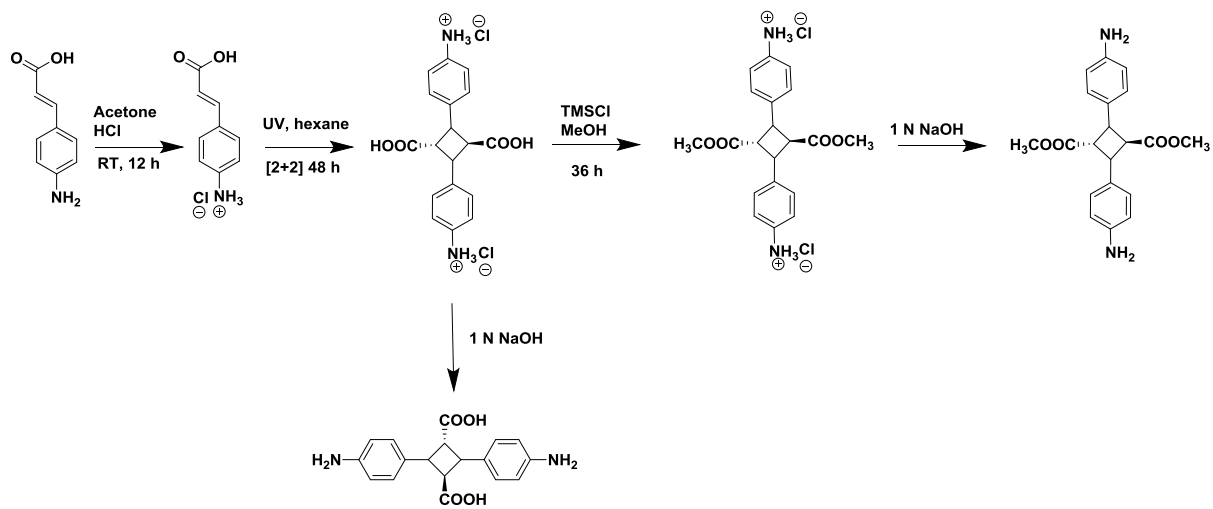

**Scheme S1.** Monomer synthesis from 4-aminocinnamic acid (4ACA)

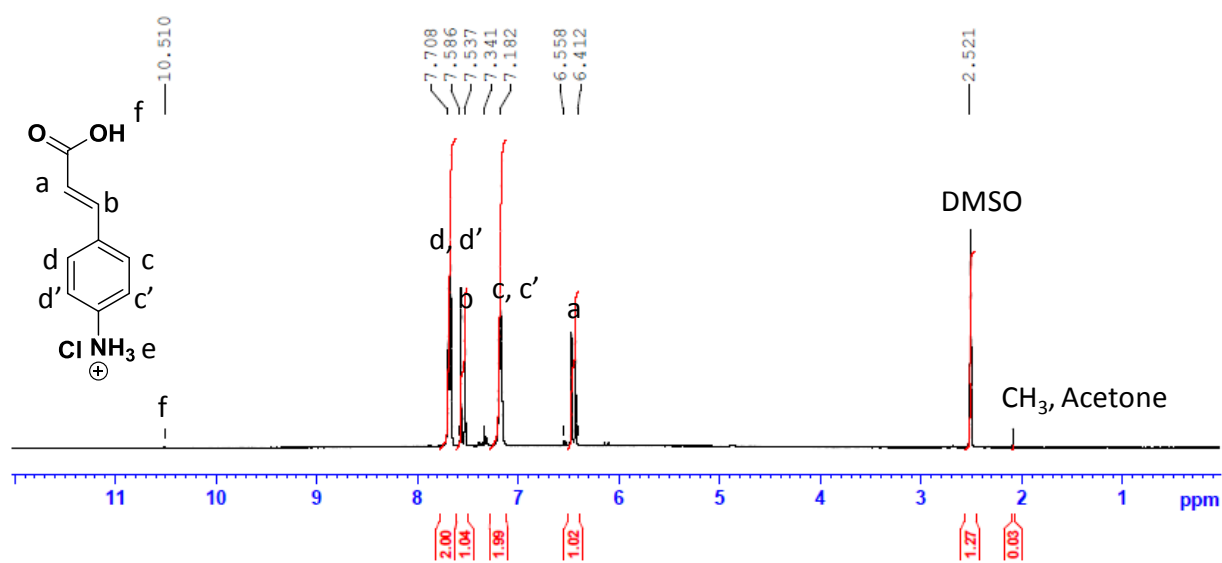

Figure S1. <sup>1</sup>H NMR characterization for 4ACA salt

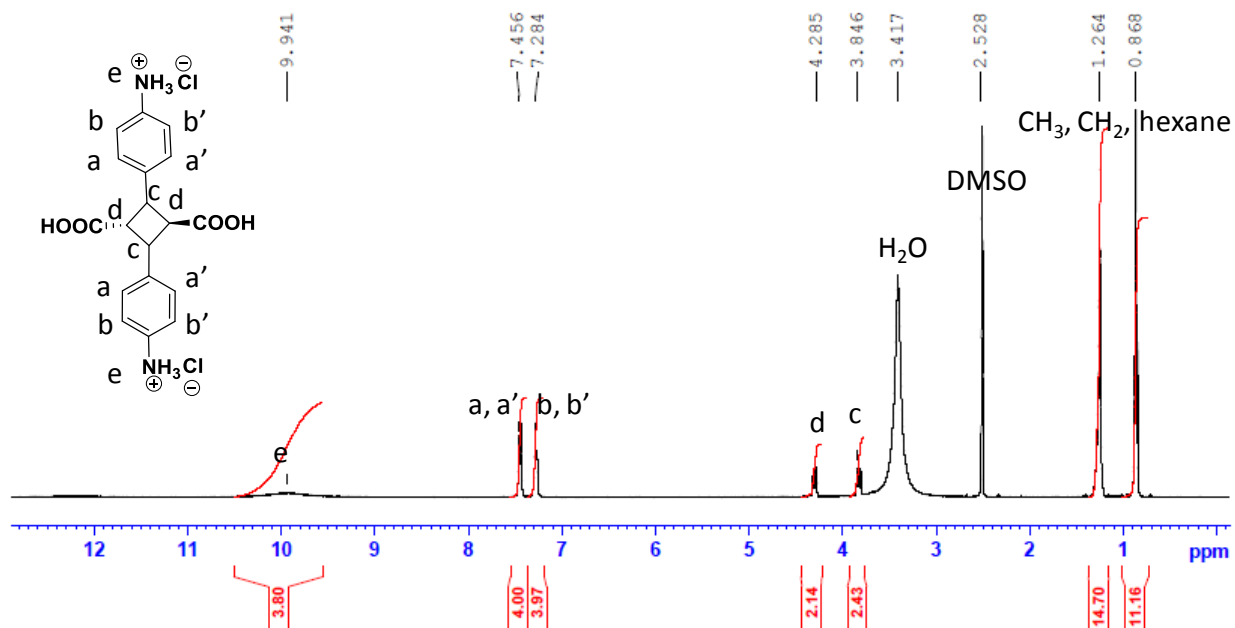

Figure S2.  $^1\text{H}$  NMR characterization for 4ATA salt

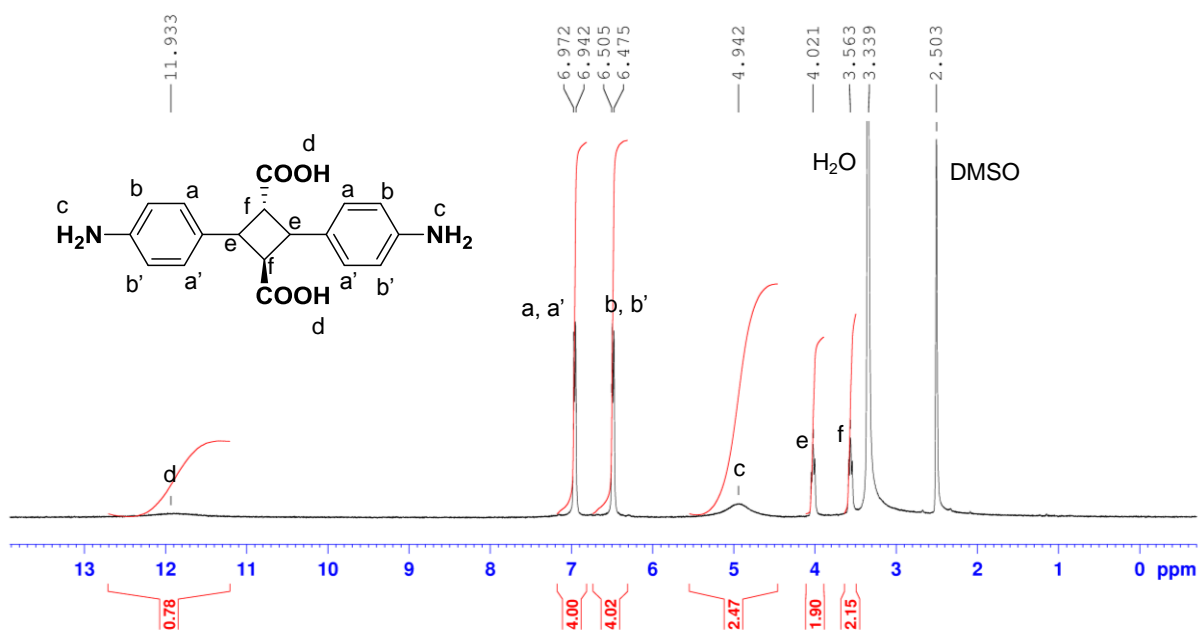

Figure S3.  $^1\text{H}$  NMR characterization for 4ATA acid

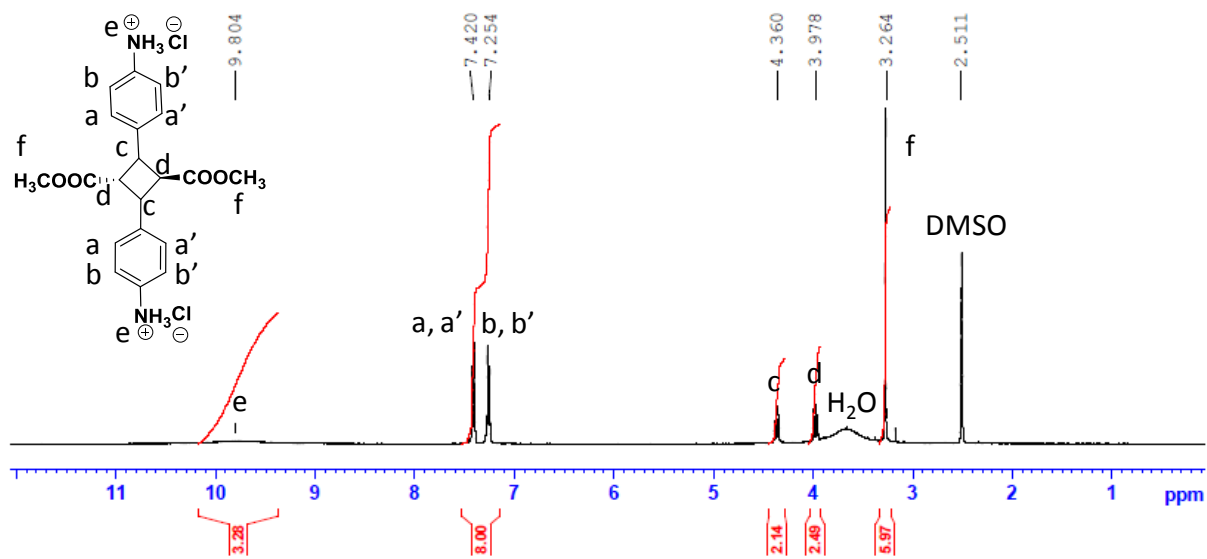

Figure S4.  $^1\text{H}$  NMR characterization for 4ATA methyl ester salt

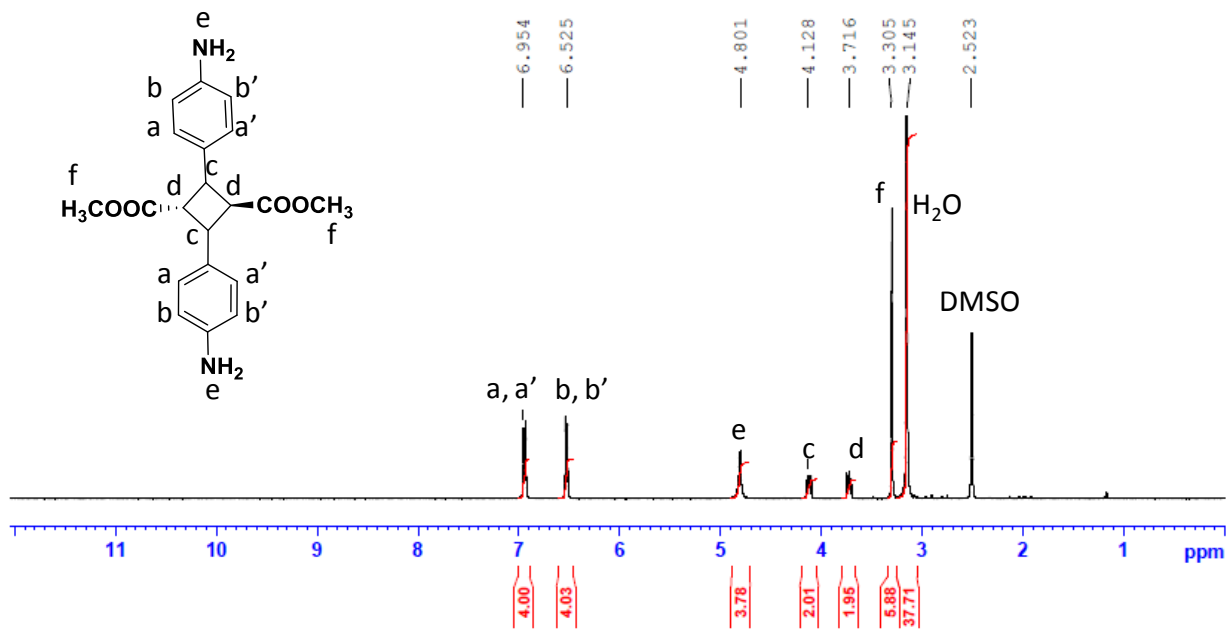

Figure S5. <sup>1</sup>H NMR characterization for 4ATA methyl ester

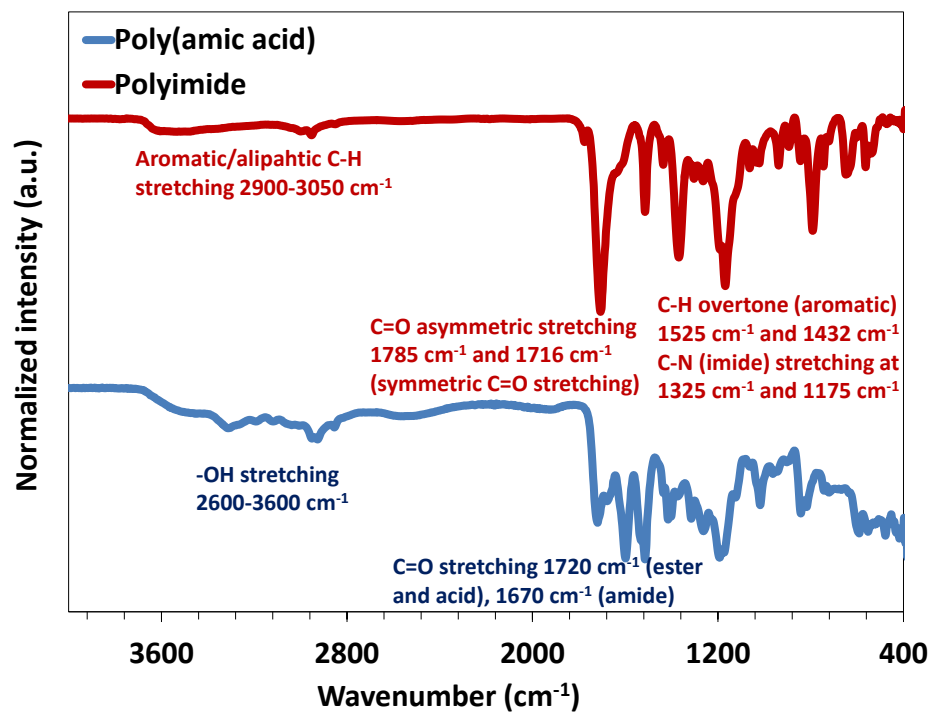

Figure S6. FTIR characterization for the prepared poly(amic acid) and polyimide



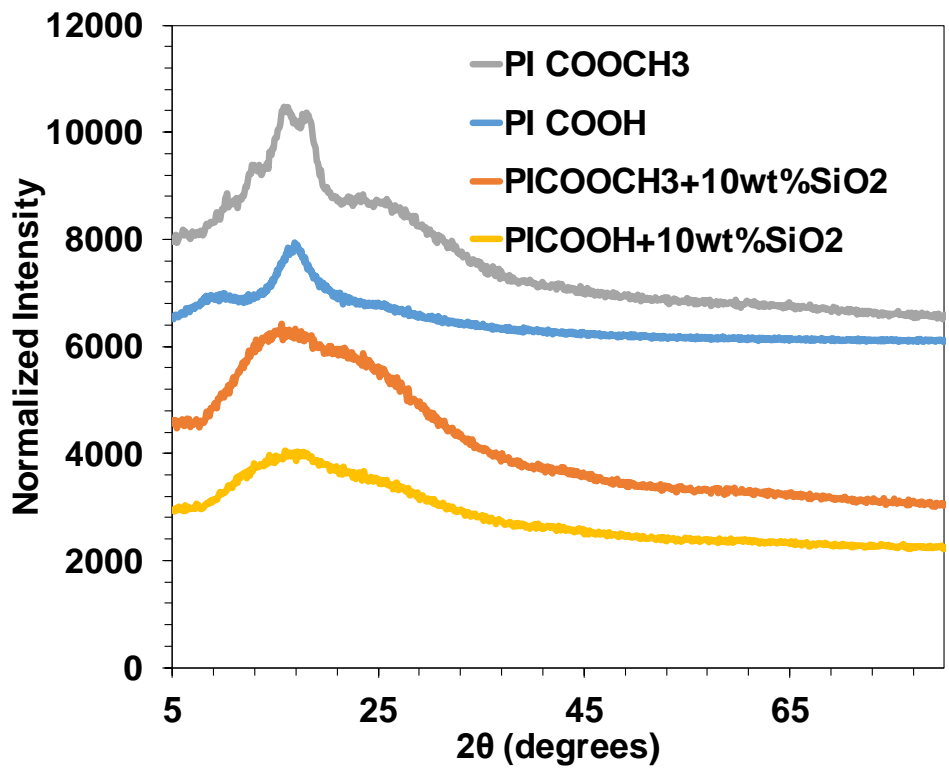

Figure S7. XRD patterns for the neat biopolyimide and after introducing 10 wt% of silica

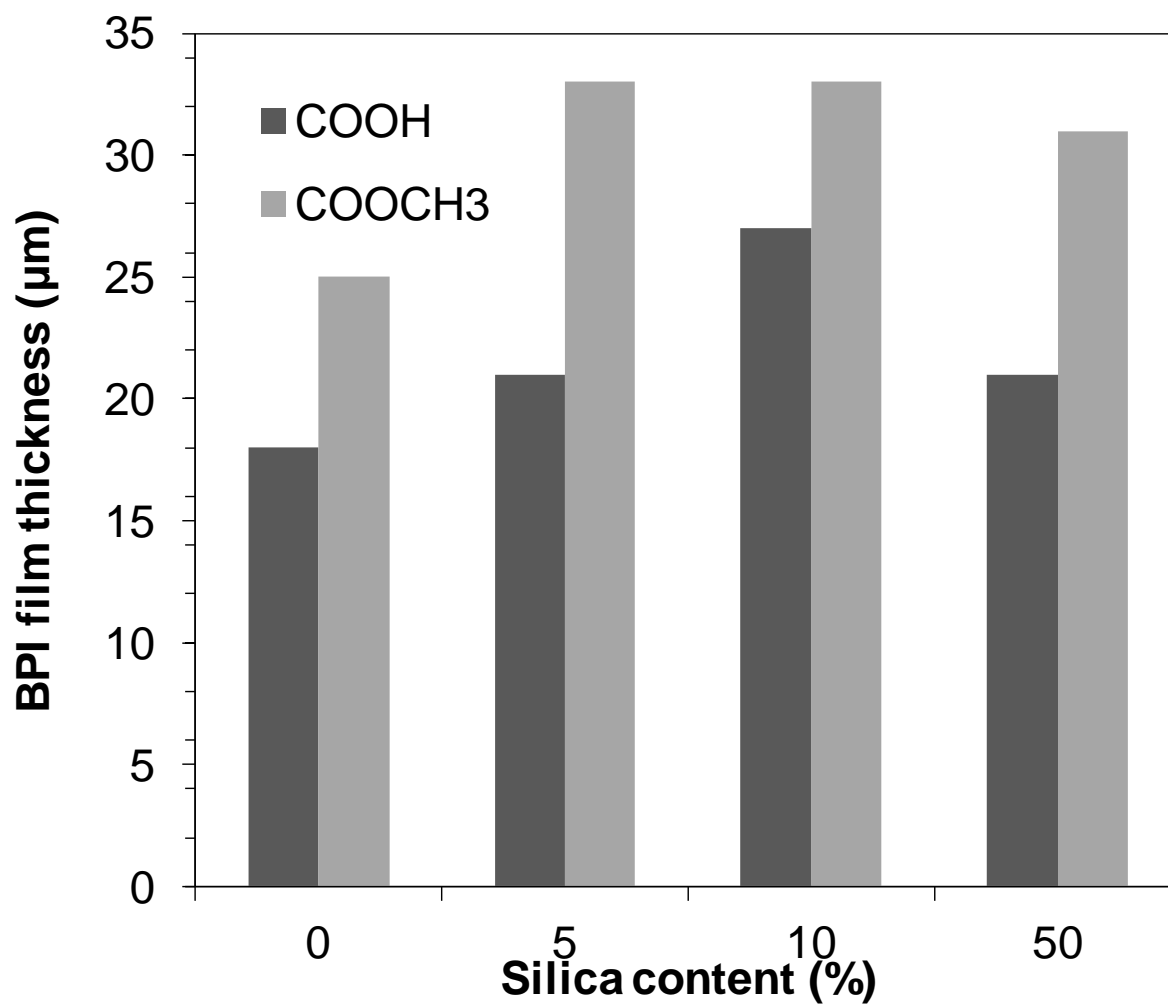

**Figure S8.** BPI film thickness with/without silica used for the electric breakdown voltage test
